# Supplementary material for: Synthesis and structure–activity relationship of benzylamine supported platinum(iv) complexes
Source: Royal Society of Chemistry journal article supplement (doi:10.1039/c3nj41141a), 2013-01-01
Supplement: c3nj41141a.pdf [file c3nj41141a.pdf]

### †Electronic Supplementary Information (ESI)

#### Experimental Section

##### General procedure for synthesis of Pt(IV)Cl<sub>4</sub>(BADs)<sub>2</sub> complexes

Initially, the K<sub>2</sub>PtCl<sub>4</sub> and BADs (molar ratio 1:2 respectively) were separately dissolved in freshly prepared solvent (absolute ethanol and Milli-Q water in 4:6 ratios respectively) using 1 MLH magnetic stirrer, REMI. Then the BADs solution was added drop wise in K<sub>2</sub>PtCl<sub>4</sub> solution with a continuous stirring at room temperature. After 10 h, the mixture turned from light red brown into yellow and after 24 h, a yellow precipitate was formed on a completion of reaction. The ppt was filtered off, washed several times with water and ethanol, and was kept overnight in vacuum oven at room temperature for absolute dryness.

**Table 1.** Absorption at 240 nm for MBA, M2CBA, M3CBA, M4CBA and at 245 nm for M4FBA before and after DNA binding.

| Conc. /M             | MBA    |       | M2CBA  |       | M3CBA  |       | M4CBA  |       | M4FBA  |       |
|----------------------|--------|-------|--------|-------|--------|-------|--------|-------|--------|-------|
|                      | Before | After |
| 1 x 10 <sup>-5</sup> | 0.352  | 0     | 0.231  | 0     | 0.245  | 0     | 0.291  | 0     | 0.200  | 0     |
| 3 x 10 <sup>-5</sup> | 0.621  | 0     | 0.651  | 0     | 0.520  | 0     | 0.659  | 0     | 0.290  | 0     |
| 5 x 10 <sup>-5</sup> | 0.820  | 0     | 0.819  | 0     | 0.766  | 0     | 0.942  | 0     | 0.368  | 0.037 |
| 7 x 10 <sup>-5</sup> | 1.109  | 0     | 0.926  | 0.385 | 0.924  | 0.055 | 1.109  | 0     | 0.510  | 0.135 |
| 9 x 10 <sup>-5</sup> | 1.396  | 0.421 | 1.033  | 0.458 | 1.201  | 0.327 | 1.240  | 0.216 | 0.809  | 0.224 |

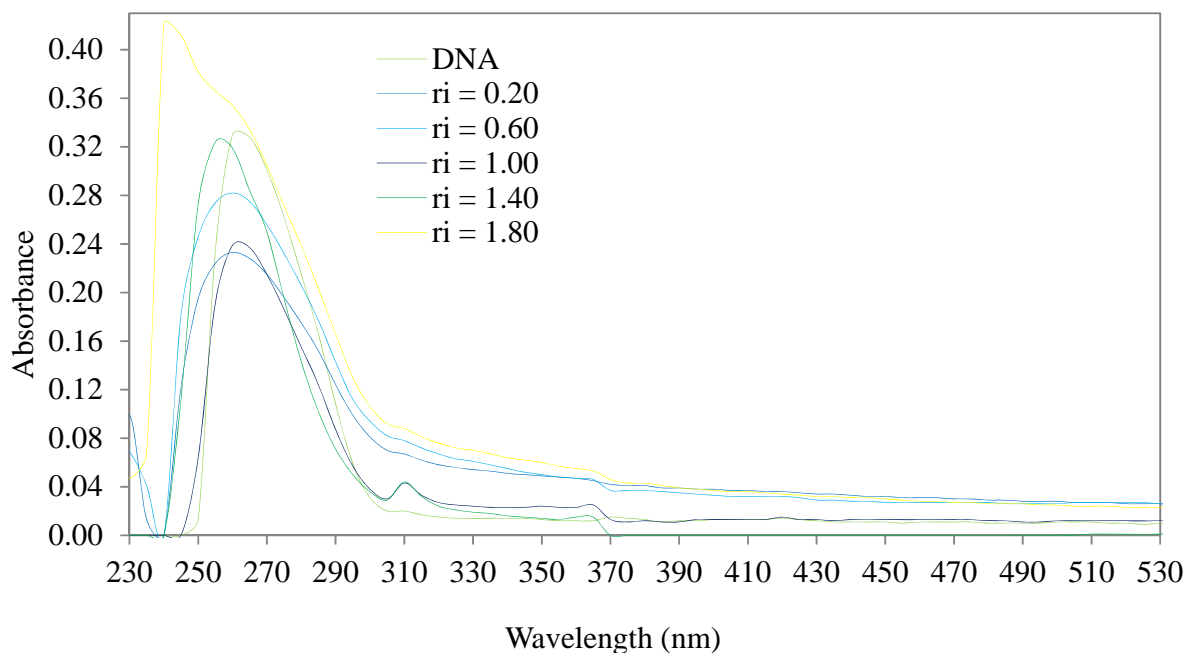

**Fig. 1** Absorption spectra of DNA ( $5 \times 10^{-5} \text{M}$ ) in absence and presence of increasing amounts of MBA ( $ri = [\text{complex}]/[\text{DNA}]$ ).

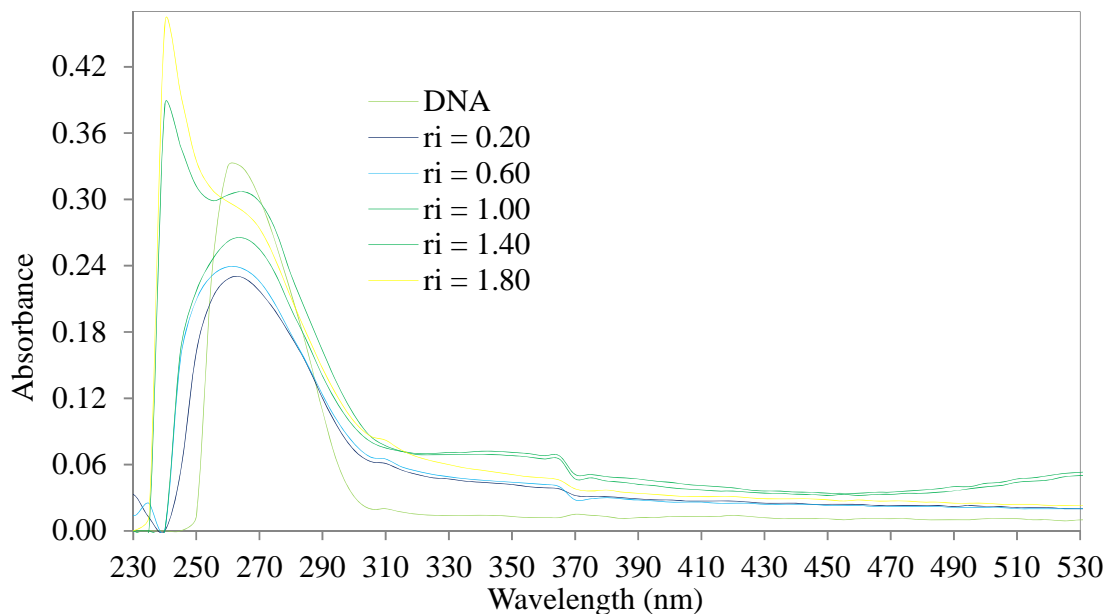

**Fig. 2** Absorption spectra of DNA ( $5 \times 10^{-5} \text{M}$ ) in absence and presence of increasing amounts of M2CBA ( $ri = [\text{complex}]/[\text{DNA}]$ ).

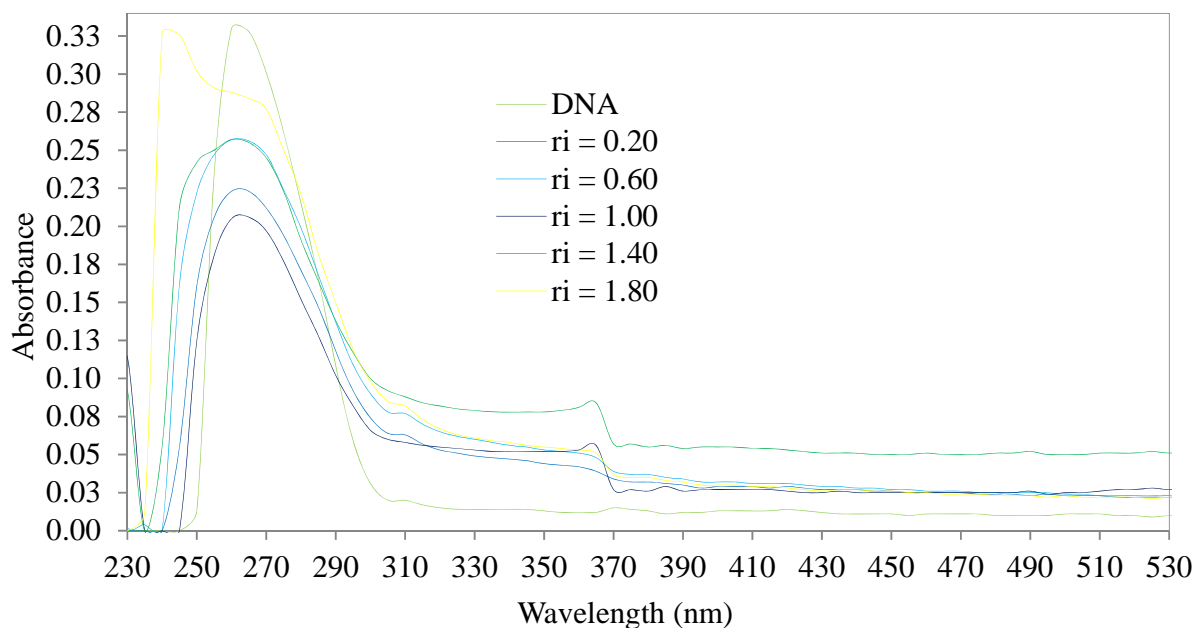

**Fig. 3** Absorption spectra of DNA ( $5 \times 10^{-5} \text{M}$ ) in absence and presence of increasing amounts of M3CBA ( $ri = [\text{complex}]/[\text{DNA}]$ ).

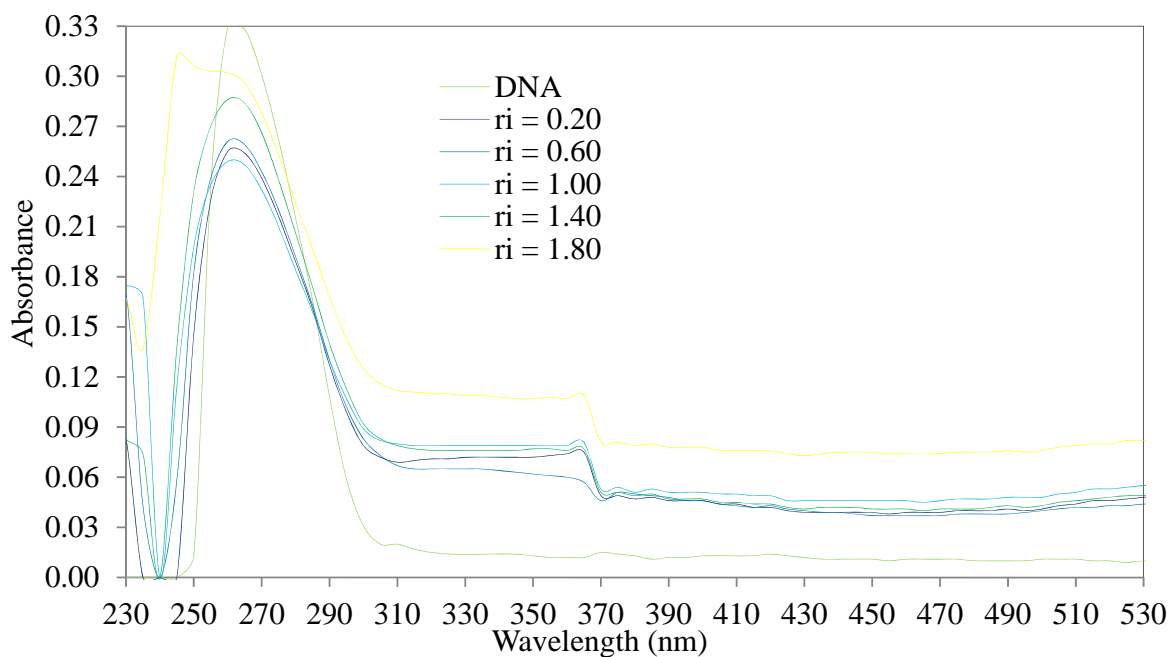

**Fig. 4** Absorption spectra of DNA ( $5 \times 10^{-5} \text{M}$ ) in absence and presence of increasing amounts of M4CBA ( $ri = [\text{complex}]/[\text{DNA}]$ ).

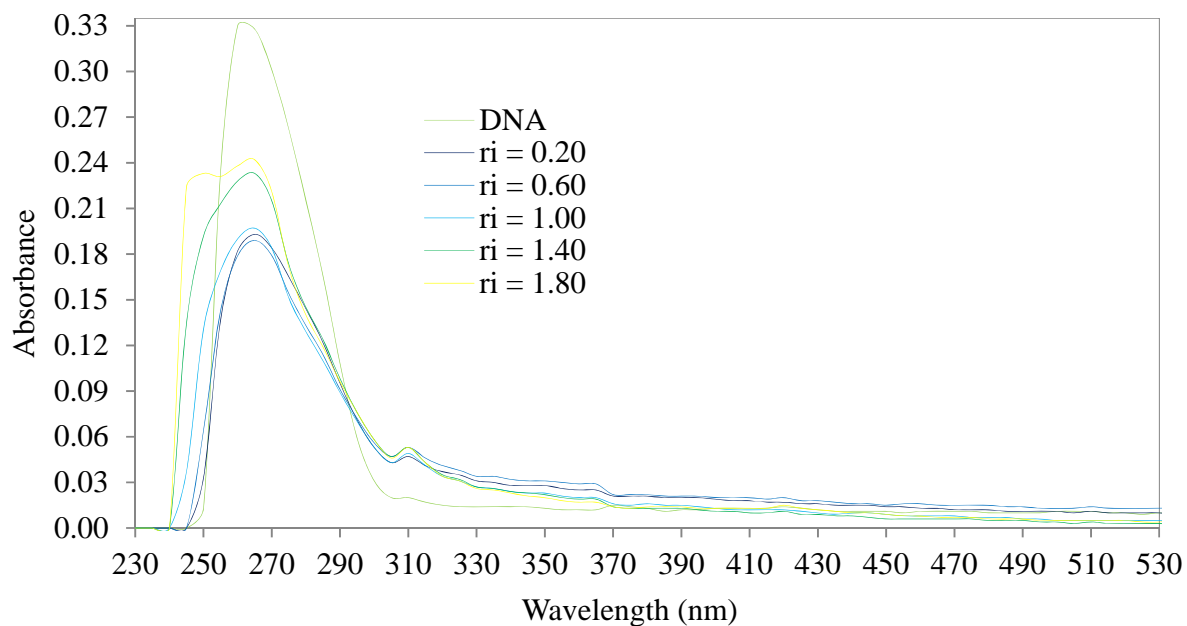

**Fig. 5** Absorption spectra of DNA ( $5 \times 10^{-5} \text{M}$ ) in absence and presence of increasing amounts of M4CBA ( $ri = [\text{complex}]/[\text{DNA}]$ ).

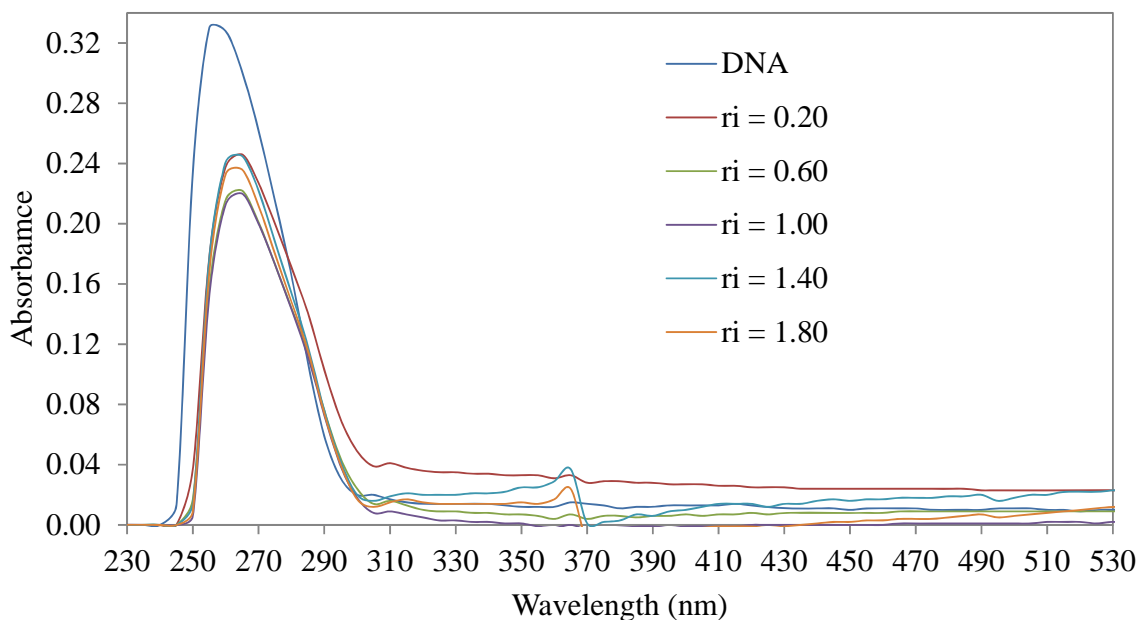

**Fig. 6** Absorption spectra of DNA ( $5 \times 10^{-5} \text{M}$ ) in absence and presence of increasing amounts of ligand phenylmethanamine ( $ri = [\text{phenylmethanamine}]/[\text{DNA}]$ ).

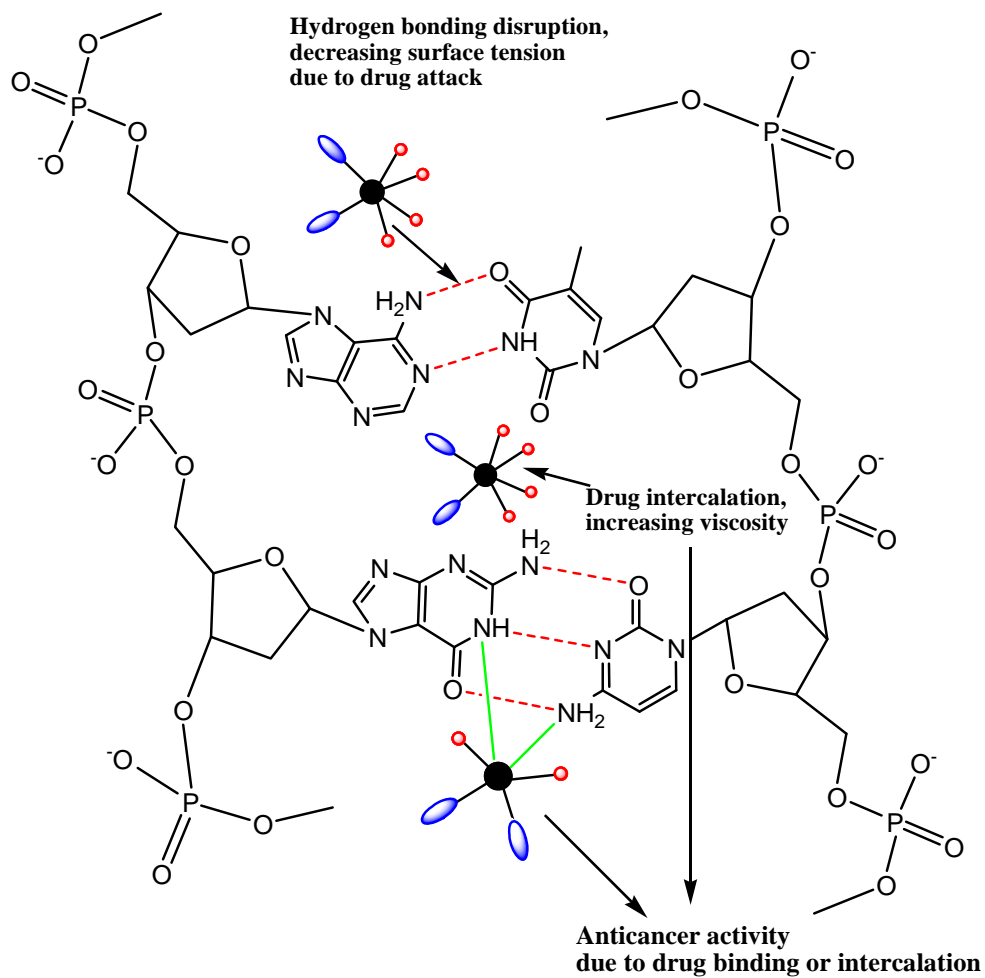

**Fig. 7** Drug-Friccohesity Interaction model which support to anticancer activity of drug.
